# Supplementary material for: Anxiety and depression in inflammatory eye disease: exploring the potential impact of topical treatment frequency as a putative psychometric item
Source: PubMed Central journal article supplement — BMJ Open Ophthalmol. 2021 Jul 6;6(1):e000649. doi: 10.1136/bmjophth-2020-000649 (PMC8261890; doi:10.1136/bmjophth-2020-000649), 2021-07-06
Supplement: bmjophth-2020-000649supp001.pdf [file bmjophth-2020-000649supp001.pdf]

**Supplementary Table 1. Quality of life amongst IED patients with and without anxiety and depression.**

Patients who demonstrated anxiety and depression (as defined by the HADS score) had poorer QoL in all four domains of the WHO-BREF questionnaire compared to those who did not

| QoL domain           | Anxiety (HADS $\geq$ 11) |               |                  | Depression (HADS $\geq$ 11) |               |                  |
|----------------------|--------------------------|---------------|------------------|-----------------------------|---------------|------------------|
|                      | No<br>(N=164)            | Yes<br>(N=32) | p-<br>value      | No<br>(N=157)               | Yes<br>(N=39) | p-<br>value      |
| Physical             | 15 (13-17)               | 10 (8-13)     | <b>&lt;0.001</b> | 15 (13-17)                  | 11 (9-13)     | <b>&lt;0.001</b> |
| Psychological        | 15 (14-17)               | 11 (9-12)     | <b>&lt;0.001</b> | 15 (14-17)                  | 11 (9-13)     | <b>&lt;0.001</b> |
| Social relationships | 16 (14-19)               | 13 (12-15)    | <b>&lt;0.001</b> | 16 (14-19)                  | 13 (12-16)    | <b>&lt;0.001</b> |
| Environment          | 16 (14-18)               | 13 (11-15)    | <b>&lt;0.001</b> | 16 (15-18)                  | 13 (12-15)    | <b>&lt;0.001</b> |

Data are reported as medians and interquartile ranges, with p-values from Mann-Whitney tests. Bold p-values are significant at  $p < 0.05$ . Patients who did not complete the sufficient questions in the relevant WHO-BREF domains were excluded from this analysis.
